# Supplementary material for: Predictability of Genetic Interactions from Functional Gene Modules
Source: PubMed Central journal article supplement (PMC5295606; doi:10.1534/g3.116.035915), 2016-12-21
Supplement: 617FigureS2.pdf [file 617FigureS2.pdf]

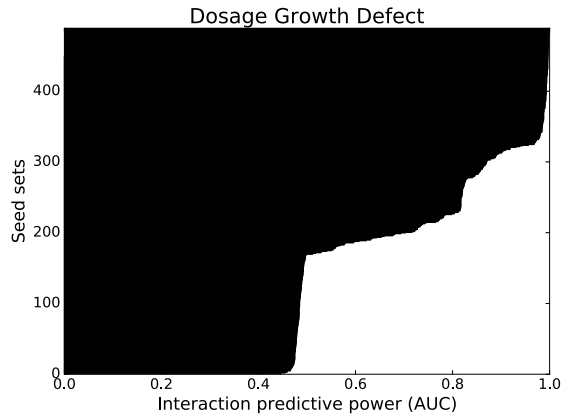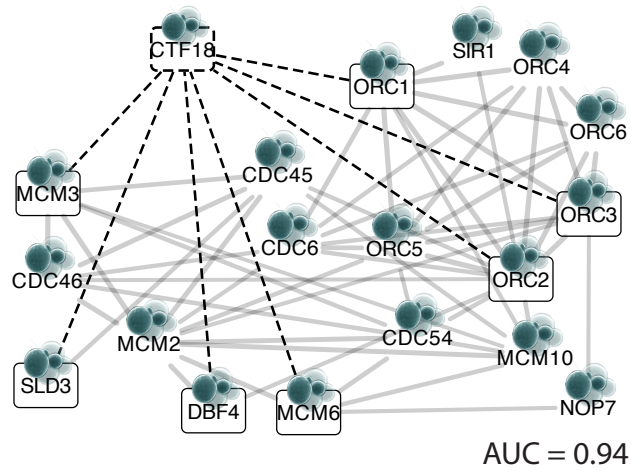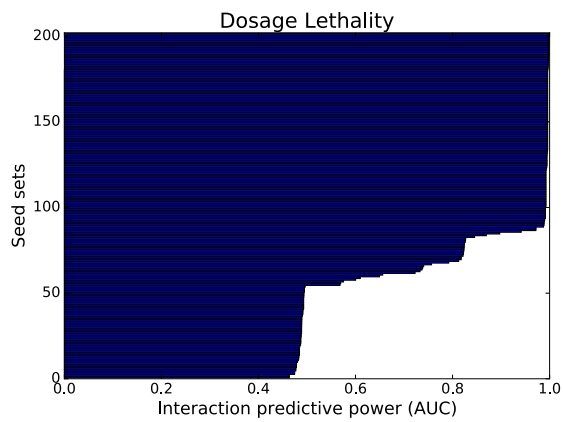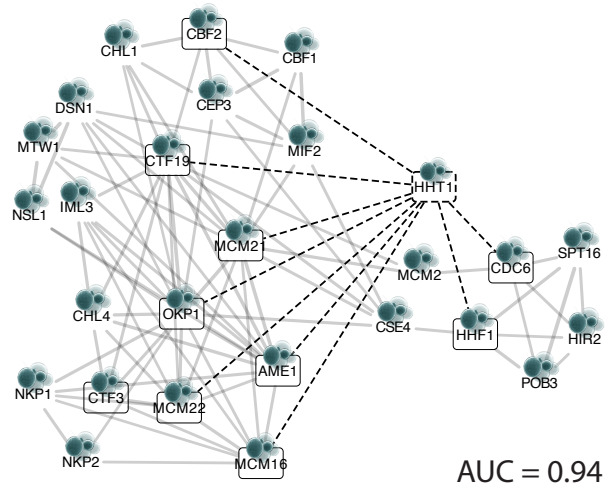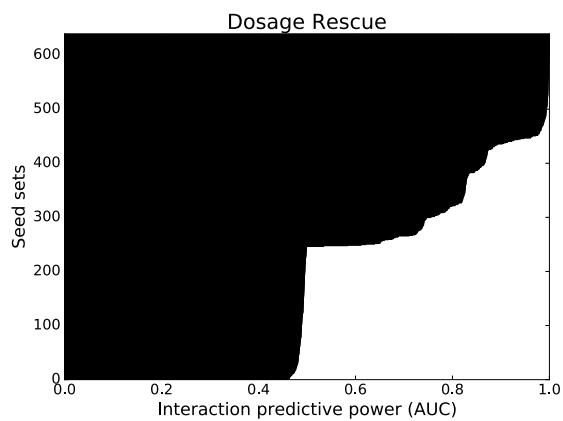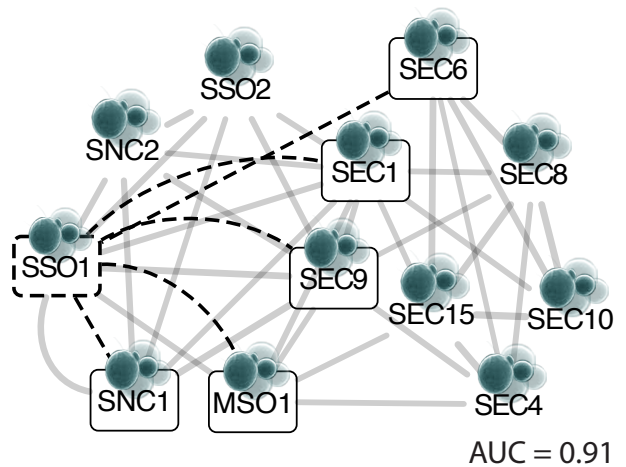

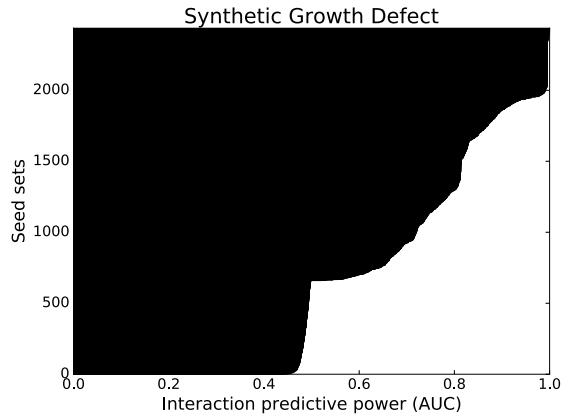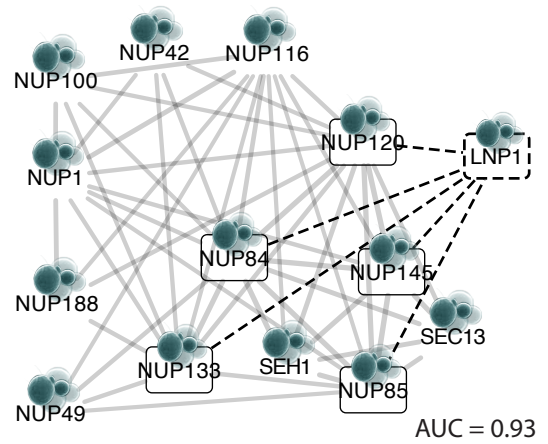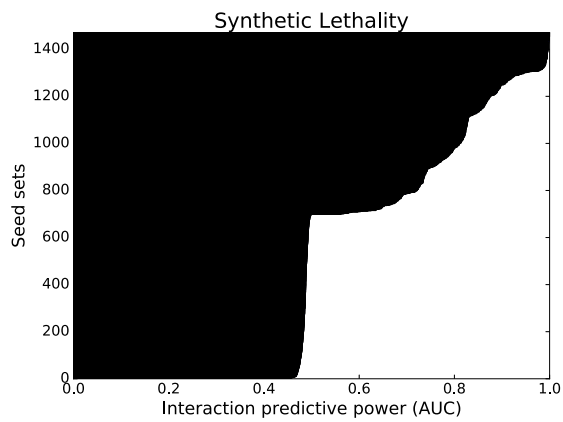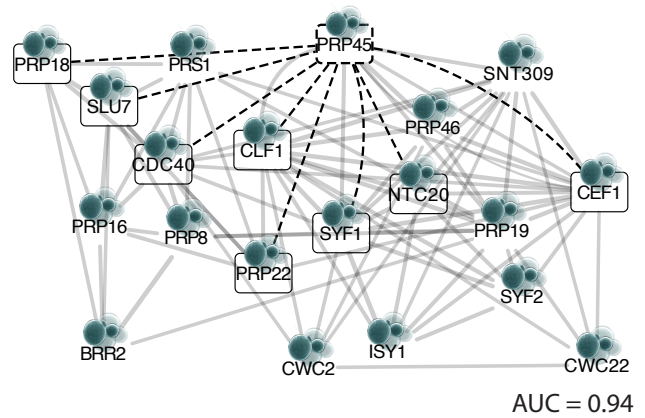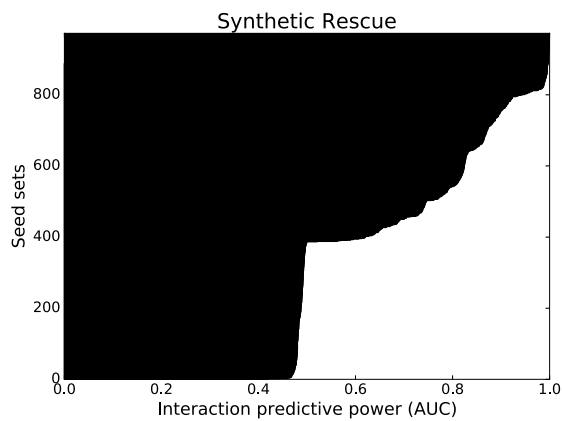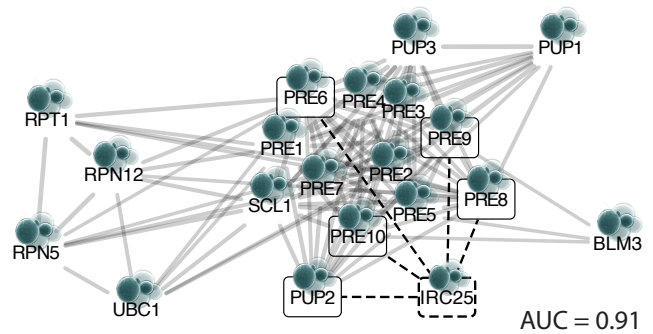

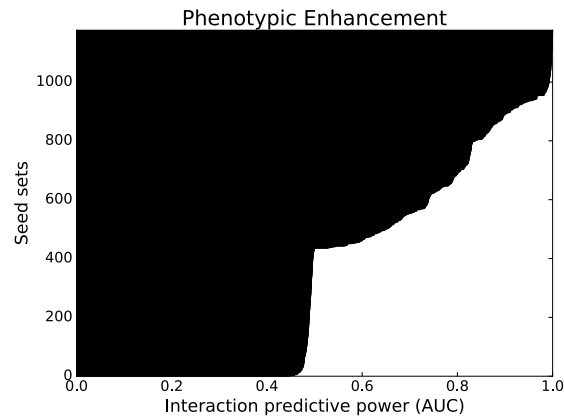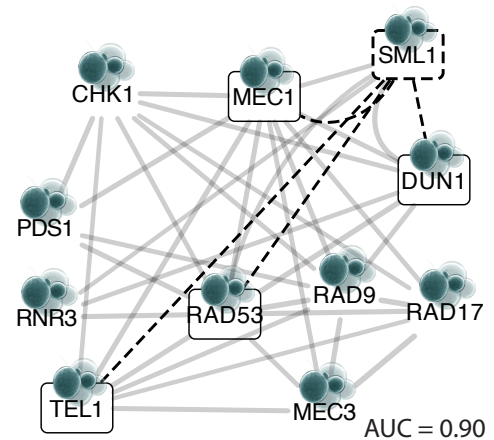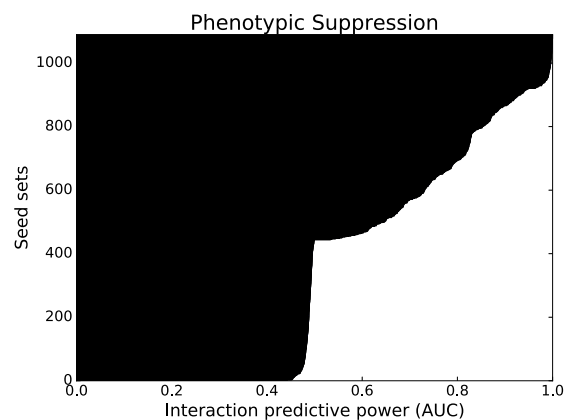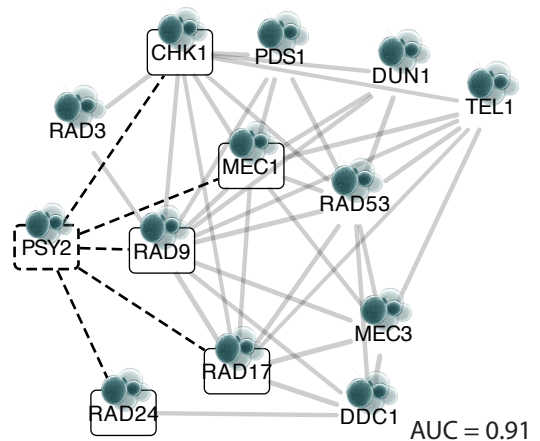

**Figure S2. Yeast functional networks are predictive for diverse genetic interactions.** The horizontal bar plots on the left hand side show the number of predictive functional net clusters for each genetic interaction. Each bar is a seed set, which is a group of genes all known to share genetic interactions with a particular gene. If the gene group is clustered in the yeast functional network, then it is predictive of additional novel genetic interactions as measured by the AUC, the area under a receiver operating characteristic curve. On the right are highly predictive functional net clusters for each genetic interaction type, with genetic interactions and functional connections indicated by dotted and solid lines, respectively. For clarity, only edges above a weight cutoff and genes with more than one interaction to the seed set are shown. In the case of phenotypic suppression for instance, the seed set consists of the gene group CHK1, MEC1, RAD9, RAD17 and RAD24, which are all known to phenotypically suppress PSY2.
