# Supplementary material for: Predictability of Genetic Interactions from Functional Gene Modules
Source: PubMed Central journal article supplement (PMC5295606; doi:10.1534/g3.116.035915), 2016-12-21
Supplement: 617TableS1.pdf [file 617TableS1.pdf]

|                         |                                                                                                                                                  |
|-------------------------|--------------------------------------------------------------------------------------------------------------------------------------------------|
| Dosage Growth Defect    | Overexpression of one gene in the presence of a mutant causes significant growth defect compared to mutant alone.                                |
| Dosage Lethality        | Overexpression of one gene in the presence of a mutant is lethal while the mutated gene alone is not.                                            |
| Dosage Rescue           | Growth defect or lethality of a single mutant is rescue by the over-expression of a second gene.                                                 |
| Phenotypic Enhancement  | Double mutant shows marked increase in non-growth phenotypic effect in comparison to either single mutant.                                       |
| Phenotypic Suppression  | Double mutant shows marked decrease in non-growth phenotypic effect in comparison to either single mutant.                                       |
| Synthetic Growth Defect | Double mutant shows marked decrease in growth in comparison to either single mutant.                                                             |
| Synthetic Rescue        | Growth defect or lethality of a single mutant is rescued by the mutation in a second gene.                                                       |
| Synthetic Lethality     | Double mutant is lethal while either single mutant is non-lethal.                                                                                |
| Negative Genetic        | Double mutant shows marked decrease in growth in comparison to either single mutant, as determined by high-throughput assays with growth scores. |
| Positive Genetic        | Double mutant shows marked increase in growth in comparison to either single mutant, as determined by high-throughput assays with growth scores. |

Table 1: **Table S1. Definitions of types of genetic interaction.** The types of genetic interactions described above are defined by BioGRID, <http://thebiogrid.org>.
